# Supplementary material for: Characterization and Tissue Tropism of Newly Identified Iflavirus and Negeviruses in Glossina morsitans morsitans Tsetse Flies
Source: MDPI journal article supplement (doi:10.3390/v13122472), 2021-12-10
Supplement: s1 [file s1]

## Supplementary materials

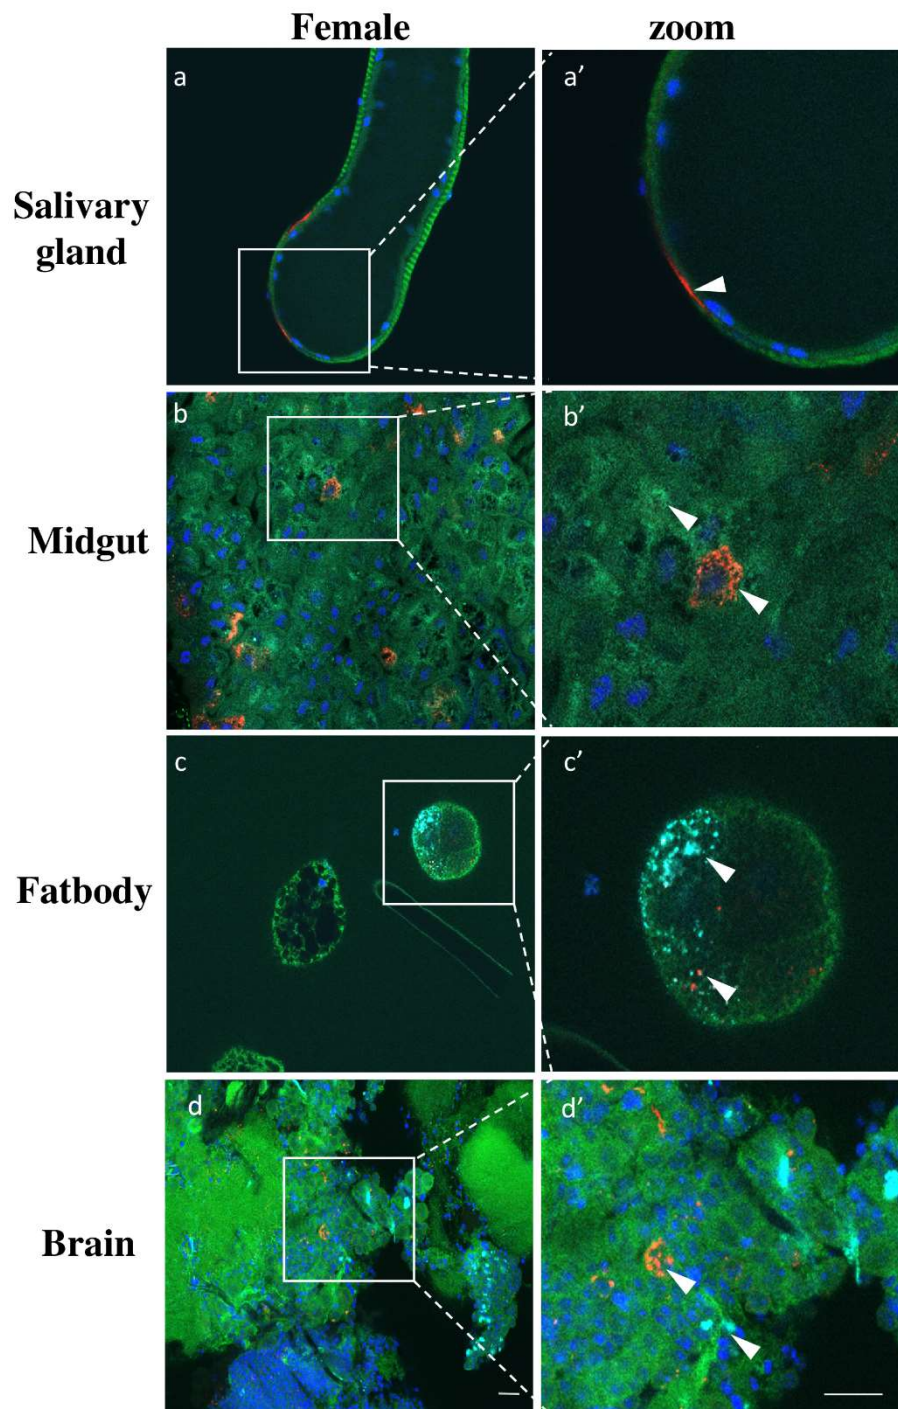

**Figure S1.** Double staining GmmIV and GmmNegeV in different tissues of 30-day old *G. m. morsitans* female flies: GmmIV - red, GmmNegeV - Cyan, Actin - green, Nucleus - blue. Scale bar: 20  $\mu$ m.

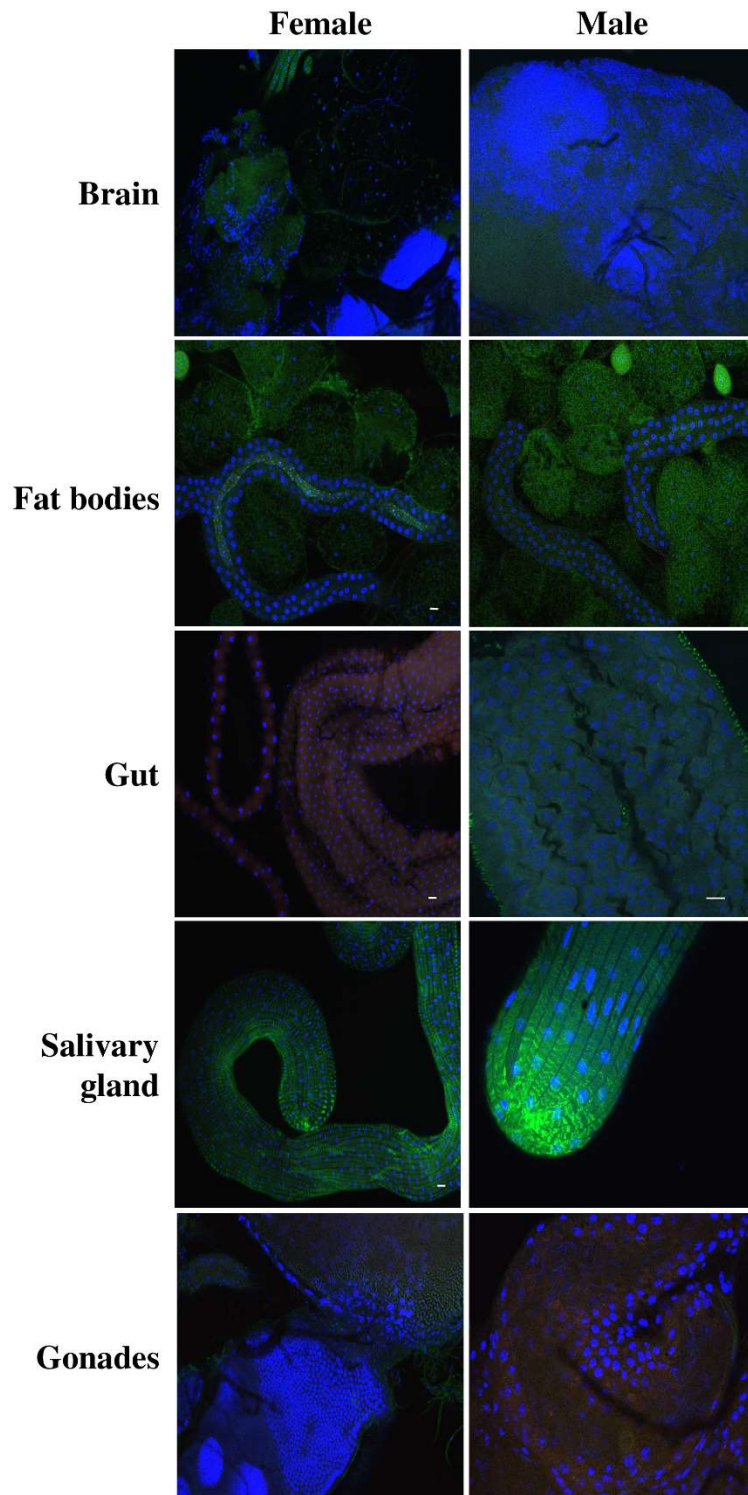

**Figure S2:** Negative control of *G. pallidipes* FISH with stellaris probes for GmmIV or GmmNegeV demonstrating the absence of Iflavivirus and Negevirus infection. Magnification 20x and 40x for females and males respectively. Scale bar: 20  $\mu$ m. blue: Nucleus (Dapi staining (4',6-diamidino-2-phenylindole)), green: F-Actin staining (488 phalloidin), red: Iflavivirus, red: Negevirus.  
(females: GmmNegeV staining, males: brain, fatbodies, gut, salivary glands: GmmNegeV, Gonads: GmmIV).

**File S1:** Statistical analysis of the RT-qPCR data. (Rmarkdown attached)

**Table S1:** Stellaris RNA-FISH probes for GmmIV and GmmNegeV.

| Probes for <i>Gmm</i> Iflavirus with Cal Fluor 610 |                       |                |              |
|----------------------------------------------------|-----------------------|----------------|--------------|
| Number                                             | Probe (5'→3')         | Probe position | % GC content |
| 1                                                  | TTAGCAGACTGACGACGGAG  | 508            | 55.00%       |
| 2                                                  | TTAATTGAGCGAGGCTCACG  | 430            | 50.00%       |
| 3                                                  | CGTAAGTACTACAGGTCCAG  | 1289           | 50.00%       |
| 4                                                  | ACCAATCTGGAAGGGATTCTG | 1595           | 50.00%       |
| 5                                                  | CAGCAGGTGAAGGTGAATCT  | 3204           | 50.00%       |
| 6                                                  | ATTTGAGGCGACAGACGTTG  | 3758           | 50.00%       |
| 7                                                  | CCCATAACGGTCACACAATA  | 109            | 45.00%       |
| 8                                                  | CGGGACATGATCACGTTTTT  | 385            | 45.00%       |
| 9                                                  | GAGCCGGTGTTAAACTTCT   | 483            | 45.00%       |
| 10                                                 | AACACGACCTGGACTATCTT  | 677            | 45.00%       |
| 11                                                 | ACCCGAGATCTTGCTTAAAC  | 1149           | 45.00%       |
| 12                                                 | AGTACTACATCAGCAGCATC  | 1723           | 45.00%       |
| 13                                                 | GGCATCTAAGTGCACCTAAA  | 1815           | 45.00%       |
| 14                                                 | GGTGGTAATACAGCCATTTG  | 2353           | 45.00%       |
| 15                                                 | GCGAACCACGATTATATGCA  | 2397           | 45.00%       |
| 16                                                 | GGATTATACGGACGCTCATT  | 2584           | 45.00%       |
| 17                                                 | TATGAAGCTGCTGTCTCTTG  | 3136           | 45.00%       |
| 18                                                 | ACCTTGAGATACAACGGGTT  | 4199           | 45.00%       |
| 19                                                 | ACACCATCTTGAGGGATATC  | 4318           | 45.00%       |
| 20                                                 | GGTAGCCATGATAGAACGTT  | 4646           | 45.00%       |
| 21                                                 | CCTAAACCAAGCTATAGGGT  | 4859           | 45.00%       |
| 22                                                 | CAGTAACCCATTCTACATCG  | 4923           | 45.00%       |
| 23                                                 | GGTTTGTCATCAAGCTTAGG  | 6178           | 45.00%       |
| 24                                                 | TGTATGGACTTCAGCAGACA  | 7151           | 45.00%       |
| 25                                                 | TAATTTGGAGGCTCAGGTTC  | 7516           | 45.00%       |
| 26                                                 | TACCGCGATGTTATGCTATA  | 198            | 40.00%       |
| 27                                                 | TATCTAACGCTCTCTTCTGT  | 594            | 40.00%       |
| 28                                                 | TATGTCTAGCTTGATGTTCC  | 744            | 40.00%       |

|    |                       |      |        |
|----|-----------------------|------|--------|
| 29 | TTTGTCCAGTGGGATCTAAT  | 2133 | 40.00% |
| 30 | AGTGCACCTGTATGGAATTT  | 2446 | 40.00% |
| 31 | AGAATCCTCCCTATTAAACC  | 2606 | 40.00% |
| 32 | TATCTCATCAGCATATCTCC  | 2870 | 40.00% |
| 33 | GTCTCAGATTCACCATTTGA  | 2940 | 40.00% |
| 34 | TATCCGGGATCAAGTTGTTT  | 3229 | 40.00% |
| 35 | CCATTTGTGGTTGAATGGTT  | 3345 | 40.00% |
| 36 | AGTAAGTGATTCATCTGCCA  | 4175 | 40.00% |
| 37 | GTACACTTACGTTGTATCCA  | 4261 | 40.00% |
| 38 | TCTTTATTATCATCTGCGGC  | 4600 | 40.00% |
| 39 | TCCCAACCATAACCAAATGT  | 4687 | 40.00% |
| 40 | TAGCTGTTAATGCTCCAAC   | 4764 | 40.00% |
| 41 | GTATATCCCTACCAACAACA  | 5007 | 40.00% |
| 42 | TATAGCCCACATCTCTAAGA  | 5232 | 40.00% |
| 43 | TTTAGGGAAACCCTCATTCA  | 5486 | 40.00% |
| 44 | TTTGAGCTTCTTTCTTCGTG  | 6141 | 40.00% |
| 45 | AGCCCAAACCTATTACGCATA | 6465 | 40.00% |
| 46 | TTTTCATCGCCTGCTATAAC  | 6682 | 40.00% |
| 47 | TTCAATTCTTCTCTCGTTGC  | 6730 | 40.00% |
| 48 | CTACCAACTTTACCTAACCA  | 6832 | 40.00% |

**Probes for *Gmm* Negevirus with Quasar 670**

| Number | Probe (5'→3')        | Probe position | % GC content |
|--------|----------------------|----------------|--------------|
| 1      | TAGTGCAAGAAACCTTGGCG | 63             | 50.00%       |
| 2      | TGTGCACCAAATCAGTGGG  | 422            | 50.00%       |
| 3      | ACCATATCCAGAAGGAACGG | 513            | 50.00%       |
| 4      | GTCATACAACGAATGCGCGA | 792            | 50.00%       |
| 5      | TATCGTAGGGAGAGGAAGCA | 1408           | 50.00%       |
| 6      | CAGGAGTGGATTGACGGATT | 1839           | 50.00%       |
| 7      | CGCAATTCGGTACAATGACC | 2261           | 50.00%       |
| 8      | GTATCAGAAGCGTCAGGATC | 2729           | 50.00%       |
| 9      | CCTCAACTATAGGAGATGCG | 3247           | 50.00%       |
| 10     | CTCTGGGAAACTGTATCTGC | 3341           | 50.00%       |
| 11     | CTCATCACGACTAGAGGGAT | 4149           | 50.00%       |
| 12     | AACAACCCGGGAATACTCAC | 4242           | 50.00%       |

|    |                      |      |        |
|----|----------------------|------|--------|
| 13 | AACAGATACGCGAGCAGGAT | 4305 | 50.00% |
| 14 | CTACCAGAAACAGTAGCGGA | 4406 | 50.00% |
| 15 | GAAGCTATGGTACGGTAACC | 4490 | 50.00% |
| 16 | TATAAGTCCGAAGCTGCACG | 4520 | 50.00% |
| 17 | GGAATCAGAGCGTGTGAA   | 5985 | 50.00% |
| 18 | ACGGGAGATCAGATTCCAAC | 6103 | 50.00% |
| 19 | AACACAGTTTGGGAGAGCTT | 218  | 45.00% |
| 20 | TGCAAGCGTGAACATTGTCT | 586  | 45.00% |
| 21 | TTACAGCATCAGCAGAATCC | 841  | 45.00% |
| 22 | GTAGCATGTTCTTGTACACG | 1685 | 45.00% |
| 23 | TAAAGTAGCAGCCATGCATC | 2004 | 45.00% |
| 24 | AACCCAGAAAGCATTTCAGC | 2111 | 45.00% |
| 25 | CAAACACACTCCCATTAGGA | 2503 | 45.00% |
| 26 | ACATACTGTATCCAGGAACC | 2540 | 45.00% |
| 27 | CTCCTTCACCAGTATAACAG | 2596 | 45.00% |
| 28 | TAGTGCAAGAAACCTTGGCG | 2693 | 44.87% |
| 29 | TGTGCACCAAAATCAGTGGG | 2967 | 44.62% |
| 30 | ACCATATCCAGAAGGAACGG | 3223 | 44.38% |
| 31 | GTCATACAACGAATGCGCGA | 3272 | 44.13% |
| 32 | TATCGTAGGGAGAGGAAGCA | 3298 | 43.88% |
| 33 | CAGGAGTGGATTGACGGATT | 3380 | 43.64% |
| 34 | CGCAATTCGGTACAATGACC | 3493 | 43.39% |
| 35 | GTATCAGAAGCGTCAGGATC | 3554 | 43.14% |
| 36 | CCTCAACTATAGGAGATGCG | 4681 | 42.89% |
| 37 | CTCTGGGAAACTGTATCTGC | 4988 | 42.65% |
| 38 | CTCATCACGACTAGAGGGAT | 5012 | 42.40% |
| 39 | AACAACCCGGAATACTCAC  | 5103 | 42.15% |
| 40 | AACAGATACGCGAGCAGGAT | 5155 | 41.90% |
| 41 | CTACCAGAAACAGTAGCGGA | 5694 | 41.66% |
| 42 | GAAGCTATGGTACGGTAACC | 5917 | 41.41% |
| 43 | TATAAGTCCGAAGCTGCACG | 6061 | 41.16% |
| 44 | GGAATCAGAGCGTGTGAA   | 6274 | 40.92% |
| 45 | ACGGGAGATCAGATTCCAAC | 7295 | 40.67% |
| 46 | AACACAGTTTGGGAGAGCTT | 7551 | 40.42% |

|    |                      |      |        |
|----|----------------------|------|--------|
| 47 | TGCAAGCGTGAACATTGTCT | 7594 | 40.17% |
| 48 | TTACAGCATCAGCAGAATCC | 7900 | 39.93% |

#### Wolbachia probes 488

| Probe name | Probe (5'→3')           |
|------------|-------------------------|
| W1         | AATCCGGCCGARCCGACCC     |
| W2         | CTTCTGTGAGTACCGTCATTATC |
